# Virulence of *Klebsiella pneumoniae* Isolates Harboring *bla*<sub>KPC-2</sub> Carbapenemase Gene in a *Caenorhabditis elegans* Model

Jean-Philippe Lavigne<sup>1,2\*</sup>, Gaëlle Cuzon<sup>3</sup>, Christophe Combescure<sup>4</sup>, Gisèle Bourg<sup>1</sup>, Albert Sotto<sup>1</sup>, Patrice Nordmann<sup>3</sup>

**1** Institut National de la Santé et de la Recherche Médicale, U1047, Université Montpellier 1, UFR de Médecine, Nîmes, France, **2** Laboratoire de Bactériologie, CHU Carémieu, Nîmes, France, **3** Service de Bactériologie-Virologie-Hygiène, Institut National de la Santé et de la Recherche Médicale U914, AP-HP Bicêtre, Université Paris Sud, Kremlin-Bicêtre, France, **4** Division of Clinical Epidemiology, University of Geneva, Geneva, Switzerland

## Abstract

*Klebsiella pneumoniae* carbapenemase (KPC) is a carbapenemase increasingly reported worldwide in *Enterobacteriaceae*. The aim of this study was to analyze the virulence of several KPC-2-producing *K. pneumoniae* isolates. The studied strains were (i) five KPC-2 clinical strains from different geographical origins, belonging to different ST-types and possessing plasmids of different incompatibility groups; (ii) seven transformants obtained after electroporation of either these natural KPC plasmids or a recombinant plasmid harboring only the *bla*<sub>KPC-2</sub> gene into reference strains *K. pneumoniae* ATCC10031/CIP53153; and (iii) five clinical strains cured of plasmids. The virulence of *K. pneumoniae* isolates was evaluated in the *Caenorhabditis elegans* model. The clinical KPC producers and transformants were significantly less virulent (LT50: 5.5 days) than *K. pneumoniae* reference strain (LT50: 4.3 days) ( $p < 0.01$ ). However, the worldwide spread KPC-2 positive *K. pneumoniae* ST258 strains and reference strains containing plasmids extracted from *K. pneumoniae* ST258 strains had a higher virulence than KPC-2 strains belonging to other ST types (LT50: 5 days vs. 6 days,  $p < 0.01$ ). The increased virulence observed in cured strains confirmed this trend. The *bla*<sub>KPC-2</sub> gene itself was not associated to increased virulence.

**Citation:** Lavigne J-P, Cuzon G, Combescure C, Bourg G, Sotto A, et al. (2013) Virulence of *Klebsiella pneumoniae* Isolates Harboring *bla*<sub>KPC-2</sub> Carbapenemase Gene in a *Caenorhabditis elegans* Model. PLoS ONE 8(7): e67847. doi:10.1371/journal.pone.0067847

**Editor:** Stefan Bereswill, Charité-University Medicine Berlin, Germany

**Received:** January 13, 2013; **Accepted:** May 22, 2013; **Published:** July 2, 2013

**Copyright:** © 2013 Lavigne et al. This is an open-access article distributed under the terms of the Creative Commons Attribution License, which permits unrestricted use, distribution, and reproduction in any medium, provided the original author and source are credited.

**Funding:** INSERM U1047 is supported by INSERM, France, Université de Montpellier 1, La Ville de Nîmes and La Région Languedoc Roussillon (Grant "Chercheur d'Avenir"). INSERM U914 is supported by INSERM. The funders had no role in study design, data collection and analysis, decision to publish, or preparation of the manuscript.

**Competing Interests:** The authors have declared that no competing interest exists.

\* E-mail: jean.philippe.lavigne@chu-nimes.fr

## Introduction

*Klebsiella pneumoniae* carbapenemases (KPC) are broad-spectrum  $\beta$ -lactamases, which confer resistance to all  $\beta$ -lactam molecules, including carbapenems. Those plasmid-encoded enzymes are identified mostly in *K. pneumoniae* [1–3]. KPC producers have been increasingly reported worldwide [1]. Eleven KPC variants (KPC-2 to KPC-12) are known differing by a few amino acids changes, KPC-2 being the most frequent KPC-type enzyme. KPC-associated enterobacterial infections do not seem to be specific to sites, organs, or tissues: most are either systemic infections, occurring in patients with multiple invasive devices or urinary tract infections without an indwelling catheter, particularly in immunocompromised patients [4,5]. No specific virulence factors have been identified as being associated to KPC-producing strains [1]. Risk factors associated with the acquisition of KPC-producing bacteria included prolonged hospitalisation, intensive care unit hospitalisation, invasive devices, immunosuppression, and multiple antibiotic agents before initial culture as known for many other multidrug resistance Gram-negative bacilli [4,6].

The present study was aimed to evaluate the virulence of several *bla*<sub>KPC-2</sub> producing *K. pneumoniae* strains using *Caenorhabditis elegans* model of infection.

## Materials and Methods

### Bacterial Strains

The studied *K. pneumoniae* strains are listed in Table 1. Five clinical KPC-2-producing *K. pneumoniae* strains were studied (origin of isolates and MLST type are indicated in brackets) (Table 1): YC (USA, ST-258), KN2303 (Colombia, ST-337), KN633 (Colombia, ST-338), A28006 (Brazil, ST-11) and 475 (Israel, ST-277) [7–11]. Virulence of these strains for *C. elegans* was compared with *K. pneumoniae* strain ATCC10031/CIP 53153. *E. coli* strain OP50, an avirulent strain corresponding to food for lab worms, was used as the negative control in the *C. elegans* model.

Bacterial strains were cultured onto Trypticase soya (TS) agar plates at 37°C under a 5% CO<sub>2</sub> atmosphere. Bacterial isolates were stored at –80°C.

### Transformation

Plasmids pBC633 (12 kb), pBC2303 (75 kb, IncN), pNYC (80 kb, IncFII), pA28006 (12 kb, IncL/M) and p475 (80 kb, IncN) encoding *bla*<sub>KPC-2</sub> gene were extracted from the clinical *K. pneumoniae* KN633, KN2303, YC, A28006 and 475 isolates respectively, and purified using the Qiafilter Plasmid Midi kit (Qiagen, Courtaboeuf, France) following the manufacturer

**Table 1.** Main characteristics of the strains and plasmids used in this study.

| Strain or plasmid                       | Source                                                                      | Plasmid gene contents                                                                  | ST  | Virulence traits                                                                                                                                        | Reference       |
|-----------------------------------------|-----------------------------------------------------------------------------|----------------------------------------------------------------------------------------|-----|---------------------------------------------------------------------------------------------------------------------------------------------------------|-----------------|
| <i>K. pneumoniae</i> ATCC10031/CIP53153 | FDA                                                                         | –                                                                                      | –   | <i>fimH-1</i> , <i>mrkD</i> , <i>kpn</i> , <i>ycfM</i> , <i>entB</i> , <i>irp1</i> , <i>irp2</i> , <i>ybtS</i> , <i>fyuA</i> , <i>iutA</i> , <i>CPS</i> | ATCC collection |
| <i>K. pneumoniae</i> KN2303             | Clinical (Colombia)                                                         | <i>bla</i> <sub>KPC-2</sub>                                                            | 337 | <i>fimH-1</i> , <i>mrkD</i> , <i>kpn</i> , <i>ycfM</i> , <i>entB</i> , <i>CPS</i>                                                                       | 7               |
| <i>K. pneumoniae</i> KN633              | Clinical (Colombia)                                                         | <i>bla</i> <sub>KPC-2</sub> <i>bla</i> <sub>TEM-1</sub> <i>bla</i> <sub>CTX-M-12</sub> | 338 | <i>fimH-1</i> , <i>mrkD</i> , <i>kpn</i> , <i>ycfM</i> , <i>entB</i> , <i>CPS</i>                                                                       | 7               |
| <i>K. pneumoniae</i> YC                 | Clinical (USA)                                                              | <i>bla</i> <sub>KPC-2</sub> <i>bla</i> <sub>TEM-1</sub> <i>bla</i> <sub>OXA-9</sub>    | 258 | <i>fimH-1</i> , <i>mrkD</i> , <i>kpn</i> , <i>ycfM</i> , <i>entB</i> , <i>CPS</i>                                                                       | 8               |
| <i>K. pneumoniae</i> A28006             | Clinical (Brazil)                                                           | <i>bla</i> <sub>KPC-2</sub> <i>bla</i> <sub>TEM-1</sub> <i>bla</i> <sub>CTX-M-2</sub>  | 11  | <i>fimH-1</i> , <i>mrkD</i> , <i>kpn</i> , <i>ycfM</i> , <i>entB</i> , <i>CPS</i>                                                                       | 9               |
| <i>K. pneumoniae</i> 475                | Clinical (Israel)                                                           | <i>bla</i> <sub>KPC-2</sub> <i>bla</i> <sub>CTX-M-15</sub>                             | 277 | <i>fimH-1</i> , <i>mrkD</i> , <i>kpn</i> , <i>ycfM</i> , <i>entB</i> , <i>CPS</i>                                                                       | 10              |
| CIP53153+ pBC2303                       | Transformant with plasmid extracted from KN2303                             | <i>bla</i> <sub>KPC-2</sub>                                                            | –   | –                                                                                                                                                       | This study      |
| CIP53153+ pBC633                        | Transformant with plasmid extracted from KN633                              | <i>bla</i> <sub>KPC-2</sub>                                                            | –   | –                                                                                                                                                       | This study      |
| CIP53153+ pNYC                          | Transformant with plasmid extracted from YC                                 | <i>bla</i> <sub>KPC-2</sub>                                                            | –   | –                                                                                                                                                       | This study      |
| CIP53153+ pA28006                       | Transformant with plasmid extracted from A28006                             | <i>bla</i> <sub>KPC-2</sub>                                                            | –   | –                                                                                                                                                       | This study      |
| CIP53153+ p475                          | Transformant with plasmid extracted from 475                                | <i>bla</i> <sub>KPC-2</sub>                                                            | –   | –                                                                                                                                                       | This study      |
| CIP53153+ pBKCMV                        | Transformant with a plasmid which was used for the cloning experiment       | –                                                                                      | –   | –                                                                                                                                                       | This study      |
| CIP53153+ pRYC-1                        | Transformant with a plasmid containing the <i>bla</i> <sub>KPC-2</sub> gene | <i>bla</i> <sub>KPC-2</sub>                                                            | –   | –                                                                                                                                                       | This study      |
| KN2303– pBC2303                         | Plasmid cure derivative strain                                              | –                                                                                      | 337 | –                                                                                                                                                       | This study      |
| KN633– pBC633                           | Plasmid cure derivative strain                                              | –                                                                                      | 338 | –                                                                                                                                                       | This study      |
| YC – pNYC                               | Plasmid cure derivative strain                                              | –                                                                                      | 258 | –                                                                                                                                                       | This study      |
| A28006– pA28006                         | Plasmid cure derivative strain                                              | –                                                                                      | 11  | –                                                                                                                                                       | This study      |
| 475– p475                               | Plasmid cure derivative strain                                              | –                                                                                      | 277 | –                                                                                                                                                       | This study      |
| pBKCMV                                  | Vector                                                                      | –                                                                                      | –   | –                                                                                                                                                       | 11              |
| pRYC-1                                  | pBKCMV-derived recombinant plasmid carrying <i>bla</i> <sub>KPC-2</sub>     | <i>bla</i> <sub>KPC-2</sub>                                                            | –   | –                                                                                                                                                       | 11              |

doi:10.1371/journal.pone.0067847.t001

recommendations. These plasmids were then electroporated into competent *K. pneumoniae* strain ATCC10031/CIP 53153. Transformants were selected on Luria Broth agar plates containing 0.5 mg/L of imipenem. Plasmid profiles of transformants were checked after their extraction as previously described [11].

The construction of the recombinant plasmid pRYC-1 that contained a *bla*<sub>KPC-2</sub> gene into cloning vector pBKCMV has been previously described [11]. This recombinant plasmid was extracted from the recipient strain, purified and electroporated into competent *K. pneumoniae* ATCC10031/CIP 53153. Transformants were selected on Luria Broth agar plates containing 0.5 mg/L of imipenem. The cloning vector pBKCMV which did not contain a *bla*<sub>KPC-2</sub> gene was also electroporated into competent *K. pneumoniae* ATCC10031/CIP 53153 using kanamycin as selection agent.

### Plasmid Curing

The curing of plasmids of each clinical *K. pneumoniae* strain was performed by successive bacterial subcultures at 44°C as described previously [12]. The loss of the plasmids was visualized by agarose gel electrophoresis and confirmed by negative PCR results for the selected plasmid genes including *bla*<sub>KPC-2</sub> gene (Table 1).

### Resistance Traits

Susceptibility to  $\beta$ -lactams in particularly to carbapenems, fluoroquinolones, tigecycline, cotrimoxazole, aminoglycosides, and colistin was determined by either the E-test (bioMérieux, Marcy l'Etoile, France) or by the agar disk diffusion method. MIC determination was performed and interpreted as recommended by

the Clinical and Laboratory Standards Institute (CLSI), as updated in 2012. The *bla*<sub>KPC</sub>, *bla*<sub>CTX-M</sub>, *bla*<sub>SHV</sub>, *bla*<sub>TEM</sub>, *bla*<sub>OXA-1/9</sub>-like genes were searched by PCR and characterized as described previously [1,11].

### Genotypic and Phenotypic Determination of Virulence Factors

The *K. pneumoniae* isolates were tested by PCR for the presence of a panel of genes encoding known virulence factors. Methods used to amplify *fimH-1* (mannose-specific adhesin subunit of type 1 fimbriae), *mrkD* (mannose-specific adhesin subunit of type 3 fimbriae), *kpn* (FimH-like adhesin), *ycfM* (outer membrane lipoprotein), *iraN* (catecholate siderophores receptor), *entB* (enterobactin biosynthesis), *iutA* (aerobactin), *fyuA* (yersiniabactin receptor), *traT* (serum resistance), *irp1*, *irp2*, *ybtS* (yersiniabactin biosynthesis), *mpfA* (regulator of mucoid phenotype A), *magA* (mucoviscosity-associated gene A), *hlyA* (hemolysin), and *cnf1* (cytotoxic necrotizing factor-1) have been described elsewhere [13].

The presence of a capsule was determined by staining with India ink. On a slide, a drop of bacterial suspension was mixed with the stain. By light microscopy, the capsule appears as a clear area between the colored background and the stained bacterial body.

### Nematode Killing Assay

The *C. elegans* model has been developed to study host-pathogen interactions. In this test, the studied bacteria is presented as food to

**Table 2.** Antibiotic susceptibility of the *K. pneumoniae* transformant strains.

| Antibiotics      | MIC (μg/ml)                      |                                        |                                           |                                        |                                         |                                          |
|------------------|----------------------------------|----------------------------------------|-------------------------------------------|----------------------------------------|-----------------------------------------|------------------------------------------|
|                  | <i>K. pneumoniae</i><br>CIP53153 | <i>K. pneumoniae</i><br>CIP53153+ pNYC | <i>K. pneumoniae</i><br>CIP53153+ pA28006 | <i>K. pneumoniae</i><br>CIP53153+ p475 | <i>K. pneumoniae</i><br>CIP53153+pBC633 | <i>K. pneumoniae</i><br>CIP53153+pBC2303 |
| Amoxicillin      | 96                               | ≥256                                   | ≥256                                      | ≥256                                   | ≥256                                    | ≥256                                     |
| Amoxicillin+CLA  | 2                                | ≥256                                   | ≥256                                      | ≥256                                   | ≥256                                    | ≥256                                     |
| Ticarcillin      | 96                               | ≥256                                   | ≥256                                      | ≥256                                   | ≥256                                    | ≥256                                     |
| Ticarcillin+CLA  | 1.5                              | ≥256                                   | ≥256                                      | ≥256                                   | ≥256                                    | ≥256                                     |
| Piperacillin     | 2                                | ≥256                                   | ≥256                                      | ≥256                                   | ≥256                                    | ≥256                                     |
| Piperacillin+TZB | 0.094                            | ≥256                                   | ≥256                                      | ≥256                                   | ≥256                                    | ≥256                                     |
| Ceftazidime      | 0.094                            | 12                                     | 16                                        | 24                                     | 32                                      | 16                                       |
| Imipenem         | 0.19                             | 8                                      | 8                                         | 12                                     | 8                                       | 8                                        |
| Ertapenem        | 0.016                            | 4                                      | 3                                         | 4                                      | 4                                       | 4                                        |
| Tigecycline      | 0.125                            | 0.125                                  | 0.125                                     | 0.125                                  | 0.125                                   | 0.125                                    |
| Gentamicine      | <2                               | <2                                     | <2                                        | >4                                     | <2                                      | <2                                       |
| Tobramycin       | <2                               | <2                                     | <2                                        | >4                                     | <2                                      | <2                                       |
| Amikacin         | <2                               | <2                                     | <2                                        | <2                                     | <2                                      | <2                                       |
| Ciprofloxacin    | <0.5                             | <0.5                                   | <0.5                                      | <0.5                                   | <0.5                                    | <0.5                                     |
| Cotrimoxazole    | <1                               | <1                                     | <1                                        | >4                                     | <1                                      | <1                                       |
| Colistin         | <2                               | <2                                     | <2                                        | <2                                     | <2                                      | <2                                       |

doi:10.1371/journal.pone.0067847.t002

**Table 3.** Letal Time 50% (LT50) of *Caenorhabditis elegans* infected by clinical and transformant *K. pneumoniae* strains.

| Strain             | Characteristics of strain | LT50 in days | (Mean ± se) | P                     |                                        |                                                                                          |
|--------------------|---------------------------|--------------|-------------|-----------------------|----------------------------------------|------------------------------------------------------------------------------------------|
|                    |                           |              |             | ATCC vs other strains | clinical vs transformants/ derivatives | 475,YC,A28006 (clinical/ mutants) vs 2303,633 (clinical/ mutants) pRYC-1 vs other strain |
| ATCC10031/CIP53153 | Reference                 |              | 4.3±0.2     | –                     |                                        | NS                                                                                       |
| KN2303             | Clinical isolate          |              | 5.7±0.3     | <0.001                | NS                                     | <0.01                                                                                    |
| KN633              | Clinical isolate          |              | 6.0±0.5     | <0.001                | NS                                     | <0.01                                                                                    |
| YC                 | Clinical isolate          |              | 5.3±0.2     | <0.001                | NS                                     | <0.01                                                                                    |
| A28006             | Clinical isolate          |              | 5.0±0.5     | <0.001                | NS                                     | <0.01                                                                                    |
| 475                | Clinical isolate          |              | 5.3±0.2     | <0.001                | NS                                     | <0.01                                                                                    |
| CIP53153+ pBC2303  | Transformant              |              | 5.9±0.1     | <0.001                | NS                                     | <0.01                                                                                    |
| CIP53153+ pBC633   | Transformant              |              | 6.3±0.2     | <0.001                | NS                                     | <0.01                                                                                    |
| CIP53153+ pNYC     | Transformant              |              | 5.6±0.4     | <0.001                | NS                                     | <0.01                                                                                    |
| CIP53153+ pA28006  | Transformant              |              | 5.5±0.5     | <0.001                | NS                                     | <0.01                                                                                    |
| CIP53153+ p475     | Transformant              |              | 5.5±0.5     | <0.001                | NS                                     | <0.01                                                                                    |
| pBk-CMV            | Transformant              |              | 4.6±0.3     | NS                    | –                                      | –                                                                                        |
| pRYC-1             | Transformant              |              | 6.6±0.4     | <0.001                | –                                      | –                                                                                        |
| KN2303– pBC2303    | Plasmid cured derivative  |              | 5.0±0.5     | <0.001                | <0.001                                 | <0.01                                                                                    |
| KN633– pBC633      | Plasmid cured derivative  |              | 5.0±0.5     | <0.001                | <0.001                                 | <0.01                                                                                    |
| YC – pNYC          | Plasmid cured derivative  |              | 4.7±0.3     | NS                    | <0.001                                 | <0.01                                                                                    |
| A28006– pA28006    | Plasmid cured derivative  |              | 4.3±0.3     | NS                    | <0.001                                 | <0.01                                                                                    |
| 475– p475          | Plasmid cured derivative  |              | 4.5±0.5     | NS                    | <0.001                                 | <0.01                                                                                    |
| OP50               | Avirulent, nematode food  |              | 8.2±0.3     | <0.001                | –                                      | –                                                                                        |

LT50 corresponds to the time for half of the worms to die. The results are representative of at least five independent trials for each group of strains.

doi:10.1371/journal.pone.0067847.t003

**Table 4.** Lawn-leaving behavior of the different strains.

| Strains                  |                                          | % occupancy after 16 h |
|--------------------------|------------------------------------------|------------------------|
| Control strain           | <i>K. pneumoniae</i> ATCC10031/CIP 53153 | 100 (±1)               |
| Clinical strains         | <i>K. pneumoniae</i> KN2303              | 98 (±2)                |
|                          | <i>K. pneumoniae</i> KN633               | 97 (±3)                |
|                          | <i>K. pneumoniae</i> YC                  | 100 (±1)               |
|                          | <i>K. pneumoniae</i> 475                 | 99 (±1)                |
|                          | <i>K. pneumoniae</i> A28006              | 100 (±1)               |
|                          |                                          |                        |
| Transformants            | pBC2303                                  | 99 (±2)                |
|                          | pBC633                                   | 97 (±4)                |
|                          | pNYC                                     | 99 (±2)                |
|                          | pA28006                                  | 100 (±1)               |
|                          | p475                                     | 100 (±1)               |
|                          | pBk-CMV                                  | 97 (±2)                |
|                          | pRYC-1                                   | 100 (±1)               |
|                          |                                          |                        |
| Plasmid cure derivatives | KN2303– pBC2303                          | 100 (±1)               |
|                          | KN633– pBC633                            | 98 (±2)                |
|                          | YC – pNYC                                | 98 (±2)                |
|                          | A28006– pA28006                          | 100 (±1)               |
|                          | 475– p475                                | 100 (±2)               |

doi:10.1371/journal.pone.0067847.t004

the nematodes instead of *E. coli* strain OP50, an avirulent strain, that is their usual food in the lab. Ingestion of the bacteria studied by the worms results in an infection and ultimately the killing death of the worms [14]. The time required for bacteria to kill the worms compared with life duration observed when the worms are fed with *E. coli* strain OP50, is an indirect marker of virulence potential of the studied bacteria. The *C. elegans* infection assay was carried out as described by Lavigne *et al.* [14] using the Fer-15 mutant line, which has a temperature sensitive fertility defect. To synchronize the growth of worms, eggs were collected using the hypochlorite method. Overnight cultures in nematode growth medium (NGM) of *K. pneumoniae* strains were harvested by centrifugation, washed once and suspended in phosphate buffered saline solution (PBS) at pH 7.0 at a concentration of 10<sup>5</sup> CFU/ml. NGM agar plates were inoculated with 10 µl of each strain and incubated at 37°C for 8 to 10 h. Plates were allowed to cool to room temperature and seeded with L4 stage worms (20–30 per plate). Plates were then incubated at 25°C and scored each day for live worms under a stereomicroscope (Leica MS5) [14]. At least three replicates repeated five times were performed for each selected clone. Lethal time 50% (LT50) corresponded to time (hours) required to kill 50% of the nematode population. The results are representative of five independent assays for each group of strains.

### *In vitro* Strain Growth

Bacteria were grown in LB broth and NGM broth. An aliquot (1 mL) of an overnight culture of each strain was transferred in 99 mL and cultured at 37°C under shaking conditions. Bacterial growth was monitored by change of the optical density at 620 nm (OD<sub>620</sub>) and determined over a period of 24 h. Growth curves were performed in triplicate for each strain and the OD<sub>620</sub> measurements were averaged for each time point in order to plot growth curves.

### Bacterial Ingestion in Worms

*In vivo* experiments consisted of measuring the number of bacteria within the *C. elegans* digestive tract 72 h after ingestion as described by Garsin *et al.* [15]. Five *C. elegans* were picked at 72 h, and washed twice in 4 µl drops of M9 medium. The nematodes were placed in a 1.5 ml Eppendorf tube containing 20 µl of M9 medium with 1% Triton X-100 and were mechanically disrupted by using a pestle. The volume was adjusted to 50 µl with M9 medium containing 1% Triton X-100 which was diluted and plated on TS agar containing 50 mg/L of ampicillin. At least three replicates were performed for each bacterial challenge. Antibiotic susceptibility of each strain recovered from the digestive tract of the nematodes was determined by the disk agar diffusion method and compared to that of the corresponding strain given as food to the nematodes.

### Bacterial Lawn Avoidance Assay

Small lawns of the different studied strains were cultured on NGM plates overnight at 25°C. Approximately 30 young adult worms grown on OP50 were put in the centre of each bacteria lawn. The number of animals on each lawn was counted after 4, 8 and 16 h as previously described [16]. The results were explained in percent occupancy corresponding to the number of worms in the bacterial lawn/the total number of worms. The experiments were performed in triplicate.

### Statistical Analysis

In order to perform pairwise comparison between two different strains, we used a log rank test. The Kruskal–Wallis test was used to compare the *in vitro* and *in vivo* bacterial growth of the different strains. A *p* value ≤0.05 given by SPSS 6.1.1 (SAS Institute Inc, Cary, NC, USA) was considered as reflecting statistical significance.

## Results

### Antibiotic Susceptibility

As with most clinical KPC producers [1], the strains were susceptible to colistin and tigecycline. *K. pneumoniae* KN2303 and *K. pneumoniae* KN633 were susceptible to all tested aminoglycosides and fluoroquinolones, *K. pneumoniae* YC was susceptible only to gentamicin, *K. pneumoniae* A28006 was susceptible to aminoglycosides, and *K. pneumoniae* 475 was only susceptible to amikacin, levofloxacin and ciprofloxacin.

The isolates contained several plasmids differing in structure and size. In each case, a single plasmid harboring the *bla*<sub>KPC-2</sub> gene was electroporated into the same *K. pneumoniae* reference strain ATCC10031/CIP 53153. The antibiotic susceptibilities of the transformants are shown in Table 2. PCR and plasmid extraction analysis confirmed the presence of a single plasmid harboring a *bla*<sub>KPC-2</sub> gene in those transformants. Transformants were resistant to at least ceftazidime and carbapenems, which was related to the expression of the carbapenemase KPC-2 (Table 2). In most of the cases, co-resistance to non- $\beta$ -lactam antibiotics was not observed for those transformants. The only exception was for transformant p475, which showed resistance to aminoglycosides (gentamicin and tobramycin) and cotrimoxazole. Conversely, strains cured of plasmids had lost resistance to extended-spectrum cephalosporins and carbapenems (data not shown).

### Virulence

The distribution of virulence factors is shown in Table 1. The different adhesins-encoding genes were present in all the isolates. The siderophore gene *entB* was also present in 100% of the strains. However, only the reference strain ATCC10031/CIP53153 harbored aerobactin genes (*irp1*, *irp2*, *ybtS*). None of our isolates carried *mpaA*, *magA*, *cnf1*, and *hlyA* genes.

The results of nematode killing assays are presented in Table 3.

The clinical KPC-producing strains were significantly less virulent (LT50 varied between 5.0 to 6.0 days  $\pm$ 0.5) than reference strain ATCC10031/CIP 53153 (LT50: 4.3 days  $\pm$ 0.2) ( $p < 0.001$ ), but significantly more virulent than the avirulent OP50 (LT50: 8.2 days  $\pm$ 0.3) ( $p < 0.001$ ). Nematode killing results allow us to constitute two groups of clinical KPC strains. A first group included *K. pneumoniae* YC, 475 and A28006 (ST-258 type and related ST type) with a mean survival time of 5 days ( $\pm$ 0.5) and a second group of *K. pneumoniae* KN2303 and KN633 (non-ST-258 type), with a mean survival time of 6 days ( $\pm$ 0.5). The difference in virulence between both groups was significant ( $p < 0.01$ ). Then, the five plasmids (pBC633, pBC2303, pNYC, pA28006 and p475) were electroporated into competent *K. pneumoniae* ATCC10031/CIP 53153. Comparison between the virulence of clinical strains and the corresponding transformants showed no significant difference ( $p = 0.4, 0.10, 0.96, 0.81$  and  $0.13$  for YC, A28006, 2303, 633 and 475, respectively). The three transformants (pNYC, p475 and pA28006) strains were significantly more virulent than that of the two transformants (pBC633 and pBC2303) strains (LT50 varied between 5.5 to 5.6 vs 5.9 to 6.3 days  $\pm$ 0.5, respectively) ( $p < 0.001$ ) showing an increased virulence strains harboring KPC plasmids from strains belonging to ST-type 258.

The five transformant strains remained significantly less virulent than the recipient ATCC10031/CIP 53153 strain (LT50 varied between 5.5 and 6.3 vs 4.3 days  $\pm$ 0.5, respectively) ( $p < 0.001$ ) suggesting that the introduction of the plasmid-mediated *bla*<sub>KPC-2</sub> gene decreased the virulence of the reference strain (Table 3). To support the direct effect of the plasmid in the bacterial virulence, the virulence of plasmid cured strains was determined. The cured strains were all significantly more virulent than the corresponding

parental strains (LT50 varied between 4.3 to 5.0 vs 5.0 to 6.0 days  $\pm$ 0.5, respectively) ( $p < 0.001$ ).

To analyze the role of the *bla*<sub>KPC-2</sub> gene itself, virulence of a same strain (ATCC10031/CIP 53153) harboring a recombinant plasmid containing the *bla*<sub>KPC-2</sub> gene (pRYC-1) was analysed and compared to that of the same plasmid without the *bla*<sub>KPC-2</sub> gene. Strain harboring pRYC-1 was significantly less virulent than the reference strain and the three most virulent clinical strains (YC, 475 and A28006) (LT50 varied between 6.6 vs 5.5 and 5.6 days  $\pm$ 0.5, respectively) ( $p < 0.001$ ). In addition, introduction of the plasmid pBK-CMV (cloning plasmid) without the *bla*<sub>KPC-2</sub> gene did not modify the virulence of the strain (LT50 varied between 4.6 vs 4.3 days  $\pm$ 0.3, respectively) ( $p = 0.19$ ) (Table 3).

### In vitro Bacterial Growth

The growth curves determined in LB medium did not show significant difference between the studied strains and the corresponding transformants. The same results were obtained by culturing the strains in the NGM medium which is used for the nematode assays (data not shown). Thus, the presence or introduction of a KPC-encoding plasmid into reference strain had no impact on the *in vitro* bacterial growth. This also confirms that the *in vivo* results were not biased by growth in NGM medium.

### Bacterial Ingestion

The differences in killing were not due to differences in the survival and proliferation of the strains in the nematode intestine since the bacterial colonization with the different strains in the digestive tract of nematodes measured 72 h after ingestion was  $10^6$  CFU without significant difference (data not shown). The antibiotic susceptibility of the strains obtained after passages in the digestive tract was strictly identical to that of the strains given as food to worms (data not shown).

Moreover, the occupancy of the worms on bacterial lawns was similar for all the strains around 100% without significant difference (Table 4).

## Discussion

Recent data suggest a relationship between *K. pneumoniae* virulence and drug resistance [17–20]. Expression of efflux pumps in *K. pneumoniae* as a mechanism of antibiotic resistance may be associated with expression of novel virulence factors required to resist to innate immune defense mechanisms in nematode and murine models and may be also associated to resistance to the host antimicrobial peptides [17,18]. The impact of carbapenemase expression on virulence is weak [21]. A recent study suggests that known virulence factors such as K1, K2, and K5 capsular polysaccharides, *mpaA* and the aerobactin gene were absent in KPC-producing isolates and these strains present low virulence in a murine lethality model [21]. In this present study, we have investigated the influence played by different plasmids harboring a single carbapenemase gene, the *bla*<sub>KPC-2</sub> gene on the bacterial ability to colonize and infect the *C. elegans* nematode. Five clinical isolates from US, Colombia, Israel and Brazil which belonged to different ST clones were studied. In nematode killing assay, the KPC-2 clinical isolates were significantly less virulent (LT50: 5 to 6 days  $\pm$ 0.5) than reference strain ATCC10031/CIP 53153 (LT50: 4.3 days  $\pm$ 0.2) ( $p < 0.001$ ). The analysis of the distribution of virulence factors in each group of strains could explain this observation with the absence of some siderophores genes in KPC isolates. However, we found the presence of the genes encoding adhesins in all the strains that demonstrates a virulence potential of the resistant strains (as also suggested by the results of the strains

with cured plasmids). Some other virulence factors are now well established in *K. pneumoniae* strains. K antigen, a capsular polysaccharide, is considered to be an important virulence factor of *K. pneumoniae*. According to these capsular polysaccharides, *K. pneumoniae* can be classified into 77 serological K antigen types. K1 isolated in South East Asia was the predominant serotype causing pyogenic liver abscess. K2 serotype is among the most common capsule types isolated from patients with UTI, pneumonia, or bacteremia. It can be assumed that K2 is the predominant serotype of human clinical isolates worldwide [22,23]. In KPC clinical strains, these serotypes are absent limiting the effect of this important factor of virulence [21].

Among the KPC-2 clinical strains, two groups of bacterial virulence can be constituted: the first group including clone ST-258 and its single- or double-locus variants, ST-11 and ST-277 with an higher virulence trait than the second group including clones ST-377 and ST-378 ( $p < 0.01$ ). Recent findings indicate the international dissemination of KPC-producing strains of ST-258 type [24]. We showed here that an increase of virulence of KPC-2 producing strains belonging to ST-258 (compared to non-ST-258 strains) may be due to the plasmid type from those KPC-2 producers of the ST-258 type. However if we compared the strains 475 and KN2303 each belonging to one of the different ST groups, they display LT50 pattern while they share the same plasmid type (IncN). This implies that other factors than just plasmids are probably also involved in virulence of KPC-2 producers in this model.

In the aim to complete our investigation, we studied the role of the *bla*<sub>KPC-2</sub> gene in KPC-2 positive plasmids contained in ST-258 *K. pneumoniae*. Actually its presence decreased virulence of the recombinant strains. These results may be explained either by the

natural role of the *bla*<sub>KPC-2</sub> gene itself or a modulation of expression of chromosome-encoded genes. Some bias due to the fact that the *bla*<sub>KPC-2</sub> gene was carried on a high-copy vector could not be excluded. Therefore, we believe that other factors expressed by plasmids of the KPC-2 plasmids of ST-258 type strain, such as colonization fitness, survival capability in the nosocomial environment, adherence, biofilm production may explain their increased virulence or/and dissemination. Indeed the nucleotide sequence of plasmids carrying the *bla*<sub>KPC-2</sub> gene is known in several cases [25,26]. Different virulence factors have been detected notably in strains of ST-258 type, which harboured a type 4-secretion system gene cluster [25]. The impact of this secretion system inducing a short, rigid pilus releasing virulence factors must be studied to evaluate its real role in *K. pneumoniae* virulence.

In conclusion, this study emphasizes that the key point with regard to the balance between virulence and resistance in the multidrug resistant bacteria studied in this work is at least the type of KPC-2 plasmids.

## Acknowledgments

Fer-15 was provided by the *Caenorhabditis* Genetics Center, which is funded by the NIH National Center for Research Resources (NCRR).

We thank David O'Callaghan for his fruitful discussion.

## Author Contributions

Conceived and designed the experiments: JPL GC PN. Performed the experiments: JPL GC GB. Analyzed the data: JPL GC AS PN. Contributed reagents/materials/analysis tools: JPL GC PN. Wrote the paper: JPL GC AS PN. Statistical analysis: CC.

## References

- Nordmann P, Cuzon G, Naas T (2009) The real threat of *Klebsiella pneumoniae* carbapenemase-producing bacteria. *Lancet Infect Dis* 9: 228–236.
- Villegas MV, Lolans K, Correa A, Kattan JN, Lopez JA, et al. (2007) First identification of *Pseudomonas aeruginosa* isolates producing a KPC-type carbapenem-hydrolyzing  $\beta$ -lactamase. *Antimicrob Agents Chemother* 51: 1553–1555.
- Robledo IE, Aquino EE, Santé MI, Santana JL, Otero DM, et al. (2010) Detection of KPC in *Acinetobacter* spp. in Puerto Rico. *Antimicrob Agents Chemother* 54: 1354–1357.
- Bratu S, Landman D, Haag R, Recco R, Eramo A, et al. Rapid spread of carbapenem-resistant *Klebsiella pneumoniae* in New York City: a new threat to our antibiotic armamentarium. *Arch Intern Med* 165: 1430–1435.
- Marchaim D, Navon-Venzia S, Schwaber MJ, Carmeli Y (2008) Isolation of imipenem-resistant *Enterobacter* species; emergence of KPC-carbapenemase, molecular characterization, epidemiology and outcomes. *Antimicrob Agents Chemother* 52: 1413–1418.
- Gasink LB, Edelstein PH, Lautenbach E, Synnestvedt M, Fishman NO (2009) Risk factors and clinical impact of *Klebsiella pneumoniae* carbapenemase-producing *K. pneumoniae*. *Infect Control Hosp Epidemiol* 30: 1180–1185.
- Villegas MV, Lolans K, Correa A, Suarez CJ, Lopez JA, et al. (2006) First detection of the plasmid-mediated class A carbapenemase KPC-2 in clinical isolates of *Klebsiella pneumoniae* from South America. *Antimicrob Agents Chemother* 50: 2880–2882.
- Naas T, Nordmann P, Vedel G, Poyart C (2005) Plasmid-mediated carbapenem-hydrolyzing  $\beta$ -lactamase KPC in a *Klebsiella pneumoniae* isolate from France. *Antimicrob Agents Chemother* 49: 4423–4424.
- Monteiro J, Santos AF, Asensi MD, Peirano G, Gales AC (2009) First report of KPC-2-producing *Klebsiella pneumoniae* strains in Brazil. *Antimicrob Agents Chemother* 53: 333–334.
- Chmelnitsky I, Hermesh O, Navon-Venezia S, Strahilevitz J, Carmeli Y (2009) Detection of aac(6)-Ib-cr in KPC-producing *Klebsiella pneumoniae* isolates from Tel Aviv, Israel. *J Antimicrob Chemother* 64: 718–722.
- Naas T, Cuzon G, Villegas MV, Lartigue MF, Quinn JP, et al. (2008) Genetic structures at the origin of acquisition of the  $\beta$ -lactamase *bla*<sub>KPC</sub> gene. *Antimicrob Agents Chemother* 52: 1257–1263.
- Di Martino P, Sirot D, Joly B, Rich C, Darfeuille-Michaud A (1997) Relationship between adherence to intestinal Caco-2 cells and multidrug resistance in *Klebsiella pneumoniae* clinical isolates. *J Clin Microbiol* 35: 1499–1503.
- El Fertas-Aissani R, Messai Y, Alouache S, Bakour R (2012) Virulence profiles and antibiotic susceptibility patterns of *Klebsiella pneumoniae* strains isolated from different clinical specimens. *Pathol Biol*: Dec 5. [Epub ahead of print].
- Lavigne JP, Blanc-Potard AB, Bourg G, Moreau J, Chanal C, et al. (2006) Virulence genotype and nematode-killing properties of extra-intestinal *Escherichia coli* producing CTX-M  $\beta$ -lactamases. *Clin Microbiol Infect* 12: 1199–1206.
- Garsin DA, Sifri CD, Mylonakis E, Qin X, Singh KV, et al. (2001) A simple model host for identifying Gram-positive virulence factors. *Proc Natl Acad Sci USA* 98: 10892–10897.
- Pradel E, Zhang Y, Pujol N, Matsuyama T, Bargmann CI, et al. (2007) Detection and avoidance of a natural product from the pathogenic bacterium *Serratia marcescens* by *Caenorhabditis elegans*. *Proc Natl Acad Sci USA* 104: 2295–2300.
- Bialek S, Lavigne JP, Chevalier J, Marcon E, Leflon-Guibout V, et al. (2010) Membrane efflux and influx modulate both multidrug resistance and virulence of *Klebsiella pneumoniae* in a *Caenorhabditis elegans* model. *Antimicrob Agents Chemother* 54: 4373–4378.
- Padilla E, Llobet E, Domenech-Sanchez A, Martínez-Martínez L, Bengoechea JA, et al. (2010) *Klebsiella pneumoniae* AcrAB efflux pump contributes to antimicrobial resistance and virulence. *Antimicrob Agents Chemother* 54: 177–183.
- Sahly H, Navon-Venezia S, Roesler L, Hay A, Carmeli Y, et al. (2008) Extended-spectrum  $\beta$ -lactamase production is associated with an increase in cell invasion and expression of fimbrial adhesins in *Klebsiella pneumoniae*. *Antimicrob Agents Chemother* 52: 3029–3034.
- Coudeyras S, Nakusi L, Charbonnel N, Forestier C (2008) A tripartite efflux pump involved in gastrointestinal colonization by *Klebsiella pneumoniae* confers a tolerance response to inorganic acid. *Infect Immun* 76: 4633–4641.
- Siu LK, Lin JC, Gomez E, Eng R, Chiang T (2012) Virulence and plasmid transferability of KPC *Klebsiella pneumoniae* at the Veterans Affairs Healthcare System of New Jersey. *Microb Drug Resist* 18: 380–384.
- Keynan Y, Rubinstein E (2007) The changing face of *Klebsiella pneumoniae* infections in the community. *Int J Antimicrob Agents* 30: 385–389.
- Podschun R, Ullmann U (1998) *Klebsiella* spp. as nosocomial pathogens: epidemiology, taxonomy, typing methods, and pathogenicity factors. *Clin Microbiol Rev* 11: 589–603.
- Endimiani A, Hujer AM, Perez F, Bethel CR, Hujer KM, et al. (2009) Characterization of *bla*<sub>KPC</sub>-containing *Klebsiella pneumoniae* isolates detected in different institutions in the Eastern USA. *J Antimicrob Chemother* 63: 427–437.
- Kassis-Chikhani N, Frangeul L, Drieux L, Sengelin C, Jarlier V, et al. (2013) Complete nucleotide sequence of the first KPC-2- and SHV-12-encoding IncX plasmid pKpS90 from *Klebsiella pneumoniae*. *Antimicrob Agents Chemother* 57: 618–620.

26. Frasson I, Lavezzo E, Franchin E, Toppo S, Barzon L, et al. (2012) Antimicrobial treatment and containment measures for an extremely drug-resistant *Klebsiella pneumoniae* ST101 isolate carrying pKPN101-IT, a novel fully sequenced *bla*<sub>KPC-2</sub> plasmid. J Clin Microbiol 50: 3768–3772.
